# Supplementary material for: Radio-photothermal therapy mediated by a single compartment nanoplatform depletes tumor initiating cells and reduces lung metastasis in the orthotopic 4T1 breast tumor model
Source: Royal Society of Chemistry journal article supplement (doi:10.1039/c5nr04587h), 2015-01-01
Supplement: c5nr04587h1.pdf [file c5nr04587h1.pdf]

# **Radio-Photothermal Therapy Mediated by a Single Compartment Nanoplatfom Depletes Tumor Initiating Cells and Reduces Lung Metastasis in Orthotopic 4T1 Breast Tumor Model**

Min Zhou,<sup>a,b</sup> Jun Zhao,<sup>a</sup> Mei Tian,<sup>b</sup> Shaoli Song,<sup>c</sup> Rui Zhang,<sup>a</sup> Sanjay Gupta,<sup>d</sup> Dongfeng Tan,<sup>e</sup> Haifa Shen<sup>f</sup>, Mauro Ferrari<sup>f</sup>, and Chun Li<sup>\*a</sup>

<sup>a</sup>Department of Cancer Systems Imaging, The University of Texas MD Anderson Cancer Center, Houston, Texas, 77030 USA. Email: [cli@mdanderson.org](mailto:cli@mdanderson.org)

<sup>b</sup>The Second Affiliated Hospital of Zhejiang University, Hangzhou, Zhejiang, China.

<sup>c</sup>Department of Nuclear Medicine, Renji Hospital, Shanghai Jiaotong University School of Medicine, Shanghai 200127, China

<sup>d</sup>Department of Interventional Radiology, The University of Texas MD Anderson Cancer Center, Houston, Texas 77030, USA

<sup>e</sup>Department of Pathology, The University of Texas MD Anderson Cancer Center, Houston, Texas 77030, USA

<sup>f</sup>Department of Nanomedicine, The Methodist Hospital System Research Institute, Houston, TX 77030

**\*Corresponding Author:** Chun Li, Department of Cancer Systems Imaging, Unit 1907, The University of Texas MD Anderson Cancer Center, 1881 East Road, Houston, TX 77054-1907  
Phone: 713-792-5182; Fax: 713-794-5456; E-mail: [cli@mdanderson.org](mailto:cli@mdanderson.org)

**Thermal gravimetric analysis (TGA).** PEG-CuS NPs were purified and centrifugal filtration at 6000 RPM for 15 min (MWCO 100K). After lyophilization, 5.161 milligram of sample was transferred to an aluminum pan and analyzed on a thermogravimetric analyzer. Figure S1 shows the TGA of PEG-CuS NPs. Weight loss occurred between 25°C and 600°C.

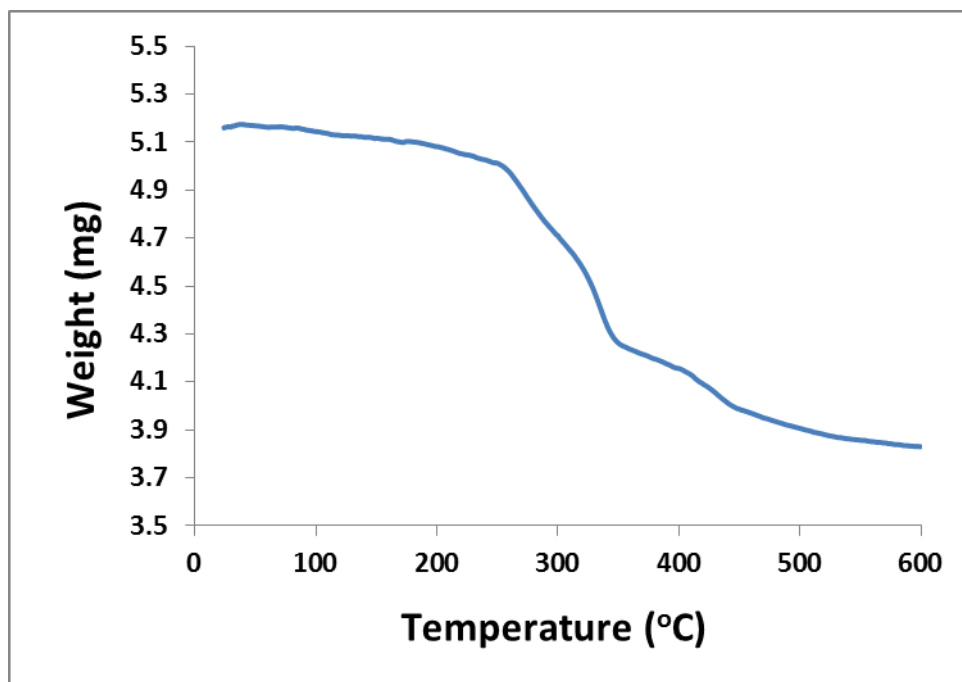

**Figure S1.** TGA of PEG-CuS NPs.

**Radiolabeling efficiency.** The radiolabeling efficiency and stability of the labeled NPs were analyzed using instant thin-layer chromatography. The chromatography strips were developed with phosphate-buffered saline (pH 7.4) containing 4 mM ethylenediaminetetraacetic acid and quantified using an IAR-2000 TLC imaging scanner (Bioscan, Washington, DC). To study the labeling stability,  $[^{64}\text{Cu}]\text{CuS}$  NPs were suspended in phosphate-buffered saline or mouse serum and incubated at 37 °C for 24 h. Free  $^{64}\text{Cu}^{2+}$  ions moved to the solvent front, and the NPs remained at the original spot. The radioactivity at the original spot was recorded as a percentage of the total radioactivity of the chromatography strip.

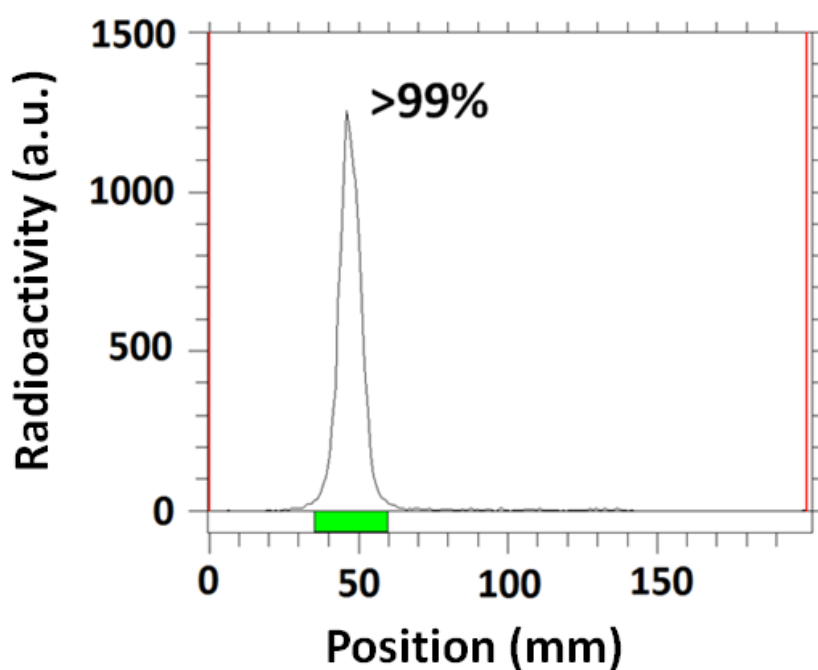

**Figure S2.** Radio-labeling efficiency of  $[^{64}\text{Cu}]\text{CuS}$  NPs. More than 99% of the radioactivity was associated with  $[^{64}\text{Cu}]\text{CuS}$  NPs at the end of synthesis. Incorporation of  $^{64}\text{Cu}$  into CuS NPs was almost quantitative.
